# Supplementary material for: Menstrual Abnormalities, Hematological Profiles, and Educational Impact Among Ghanaian Adolescents: A School-Based Study
Source: Research Square preprint supplement (doi:10.21203/rs.3.rs-6898897/v1), 2025-08-27
Supplement: Supplementary file 1 [file 32fa43f6a21e3cf32e05da37.docx]

**Supplementary Tables**

**S1: Demographic characteristics of study participants**

| **Variable** | **Frequency (n = 389)** | **Percentage (%)** |
| --- | --- | --- |
| **Age group (years)** |  |  |
| ≤15 | 171 | 44.0 |
| 16 – 19 | 218 | 56.0 |
| **Educational status** |  |  |
| Primary | 14 | 3.6 |
| JHS | 72 | 18.5 |
| SHS | 303 | 77.9 |
| **School** |  |  |
| Notre Dame SHS | 303 | 77.9 |
| St Thomas R/C JHS | 27 | 6.9 |
| Methodist | 59 | 15.2 |
| **Takes food supplements** |  |  |
| No | 344 | 88.4 |
| Yes | 45 | 11.6 |
| **Takes blood tonic** |  |  |
| No | 374 | 96.1 |
| Yes | 15 | 3.9 |
| **On medication** |  |  |
| No | 346 | 88.9 |
| Yes | 43 | 11.1 |
| **Type of medication** |  |  |
| Anti-ulcer | 16 | 37.2 |
| Analgesics | 8 | 18.6 |
| Antibiotics | 6 | 14.0 |
| Folic acid | 5 | 11.6 |
| Oral contraceptives | 3 | 7.0 |
| Anti-asthmatics | 2 | 4.7 |
| Other | 3 | 7.0 |
| **Frequency meal taken per day** |  |  |
| Twice | 31 | 8.0 |
| Thrice | 281 | 72.1 |
| 4 or more | 77 | 19.8 |
| **Frequency of consuming iron-rich diets** |  |  |
| Very often | 40 | 10.3 |
| Often | 50 | 12.9 |
| Rarely | 299 | 76.9 |
| **Have a diet restriction** |  |  |
| No | 322 | 82.8 |
| Yes | 67 | 17.2 |
| **School has adequate washrooms** |  |  |
| No | 161 | 41.4 |
| Yes | 228 | 58.6 |
| **Rating of overall well-being** |  |  |
| Bad | 251 | 64.5 |
| Good | 138 | 35.5 |

Data presented as frequency and percentages (%). JHS: Junior High School, SHS: Senior High School

**S2: Perceived effects of menstruation among study participants**

| **Variable** | **Frequency (n = 389)** | **Percentage (%)** |
| --- | --- | --- |
| **Does your period affect your ability to concentrate in class** |  |  |
| No | 219 | 56.3 |
| Yes | 170 | 43.7 |
| **Does your menstrual period affect your participation in extracurricular activities?** |  |  |
| No | 184 | 47.3 |
| Yes | 205 | 52.7 |
| **Ever missed school due to your menstrual period?** |  |  |
| No | 317 | 81.5 |
| Yes | 72 | 18.5 |
| **Frequency of missing school** |  |  |
| 1 day | 50 | 70.4 |
| 2 to 3 days | 21 | 29.6 |
| **Ever discussed menstrual problems with your teacher or school staff?** |  |  |
| No | 342 | 87.9 |
| Yes | 47 | 12.1 |
| **How supportive was your discussion with school staff** |  |  |
| Very supportive | 27 | 57.4 |
| Somewhat supportive | 8 | 17.0 |
| Not supportive | 12 | 25.5 |

Data presented as frequency and percentages

**S3: Effects of menstruation on academic activities of study participants**

|  | **Affects concentration in Class** | |  |
| --- | --- | --- | --- |
| **Variable** | **No (n = 219)** | **Yes (n = 170)** | **p-value** |
| **Menstrual cycle** |  |  | **<0.001** |
| Normal | 70 (32.0) | 26 (15.3) |  |
| Abnormal | 149 (68.0) | 144 (84.7) |  |
|  | **Affects Participation in Extracurricular Activity** | |  |
|  | **No (n = 184)** | **Yes (n = 205)** |  |
| **Menstrual cycle** |  |  | **<0.001** |
| Normal | 68 (37.0) | 28 (13.7) |  |
| Abnormal | 116 (63.0) | 177 (86.3) |  |
|  | **Ever Missed Class** | |  |
|  | **No (n = 317)** | **Yes (n = 72)** |  |
| **Menstrual cycle** |  |  | **<0.001** |
| Normal | 91 (28.7) | 5 (6.9) |  |
| Abnormal | 226 (71.3) | 67 (93.1) |  |

Data presented as frequency (%), Chi-square p-values are presented, p<0.05 was considered statistically significant. Bolded p-values were statistically significant.

**S4: Pre-menstrual haematological parameters of adolescents stratified by menstrual abnormalities**

| **Parameter** | **Normal (n = 71)** | **Dysmenorrhea (n = 165)** | **Oligomenorrhea (n = 29)** | **Amenorrhea (n = 17)** | **Polymenorrhea (n = 18)** | **Prolonged Bleeding (n = 3)** | **p-value** |
| --- | --- | --- | --- | --- | --- | --- | --- |
| WBC (10⁹/L) | 7.21 ± 2.63 | 7.26 ± 2.65 | 6.69 ± 2.03 | 6.95 ± 2.89 | 7.57 ± 3.55 | 11.51 ± 5.01 | 0.102 |
| Lymphocytes (%) | 47.99 ± 19.72 | 47.12 ± 18.48 | 46.87 ± 13.19 | 42.95 ± 14.11 | 42.34 ± 18.44 | 27.31 ± 18.37 | 0.346 |
| Monocytes (%) | 6.80 ± 3.10 | 7.21 ± 5.35 | 9.35 ± 9.10 | 9.01 ± 4.65 | 7.14 ± 5.03 | 2.93 ± 1.35 | 0.128 |
| Neutrophils (%) | 43.27 ± 18.18 | 43.36 ± 17.17 | 43.12 ± 13.54 | 46.55 ± 15.52 | 48.11 ± 18.91 | 42.50 ± 17.43 | 0.874 |
| Eosinophils (%) | 1.45 ± 2.07 | 1.59 ± 2.58 | 1.70 ± 1.59 | 1.36 ± 0.99 | 1.86 ± 2.41 | 0.48 ± 0.14 | 0.924 |
| Basophils (%) | 0.12 ± 0.09 | 0.14 ± 0.15 | 0.11 ± 0.08 | 0.13 ± 0.09 | 0.15 ± 0.09 | 0.09 ± 0.06 | 0.716 |
| Lymphocytes (#) | 3.32 ± 1.56 | 3.25 ± 1.40 | 3.08 ± 1.40 | 2.96 ± 1.86 | 3.13 ± 2.05 | 3.71 ± 1.88 | 0.917 |
| Monocytes (#) | 0.47 ± 0.25 | 5.04 ± 58.12 | 0.53 ± 0.37 | 0.63 ± 0.44 | 0.60 ± 0.77 | 0.51 ± 0.11 | 0.975 |
| Neutrophils (#) | 3.29 ± 2.39 | 3.34 ± 2.76 | 2.93 ± 1.27 | 3.60 ± 2.03 | 3.55 ± 2.55 | 4.72 ± 1.68 | 0.846 |
| Eosinophils (#) | 0.09 ± 0.12 | 0.11 ± 0.19 | 0.11 ± 0.11 | 0.10 ± 0.08 | 0.11 ± 0.09 | 0.09 ± 0.05 | 0.983 |
| Basophils (#) | 0.01 ± 0.01 | 0.02 ± 0.05 | 0.01 ± 0.01 | 0.02 ± 0.04 | 0.01 ± 0.01 | 0.02 ± 0.01 | 0.785 |
| RBC (10¹²/L) | 4.55 ± 0.74 | 4.79 ± 1.29 | 4.47 ± 0.79 | 4.35 ± 0.52 | 4.39 ± 0.72 | 4.86 ± 0.49 | 0.241 |
| Haemoglobin (g/dL) | 12.61 ± 1.27 | 12.86 ± 1.69 | 13.13 ± 1.61 | 12.15 ± 1.30 | 12.59 ± 1.90 | 14.37 ± 1.94 | 0.132 |
| Haematocrit (%) | 39.48 ± 6.23 | 38.28 ± 6.94 | 37.76 ± 8.84 | 37.79 ± 7.41 | 39.43 ± 6.19 | 47.27 ± 12.70 | 0.232 |
| MCV (fL) | 87.95 ± 11.51 | 83.01 ± 14.72 | 87.58 ± 13.31 | 87.31 ± 15.61 | 92.16 ± 21.35 | 96.70 ± 18.70 | **0.022** |
| MCH (pg) | 32.12 ± 32.25 | 29.37 ± 15.86 | 29.82 ± 3.32 | 28.20 ± 3.41 | 29.07 ± 4.45 | 29.77 ± 1.84 | 0.946 |
| MCHC (g/dL) | 32.48 ± 3.13 | 34.25 ± 4.87 | 34.41 ± 4.32 | 32.94 ± 4.34 | 32.28 ± 4.89 | 31.00 ± 4.00 | **0.037** |
| RDW-SD (fL) | 70.97 ± 30.09 | 82.12 ± 15.47 | 78.04 ± 23.53 | 88.94 ± 7.09 | 83.37 ± 10.50 | 89.70 ± 4.39 | **0.001** |
| RDW-CV (%) | 14.29 ± 15.60 | 12.45 ± 8.16 | 11.19 ± 1.22 | 11.93 ± 3.82 | 12.01 ± 2.06 | 11.90 ± 1.25 | 0.714 |
| Platelets (10⁹/L) | 236.99 ± 130.37 | 229.25 ± 79.07 | 238.83 ± 112.10 | 204.65 ± 82.99 | 189.56 ± 74.83 | 206.33 ± 35.23 | 0.418 |
| MPV (fL) | 8.35 ± 0.76 | 8.39 ± 5.07 | 10.36 ± 12.67 | 8.31 ± 0.79 | 8.28 ± 1.22 | 8.73 ± 0.72 | 0.622 |
| PDW (fL) | 10.62 ± 1.24 | 10.37 ± 1.69 | 10.26 ± 1.44 | 10.56 ± 1.40 | 11.19 ± 2.08 | 11.63 ± 0.23 | 0.207 |
| PCT (%) | 0.33 ± 1.18 | 0.18 ± 0.06 | 0.19 ± 0.07 | 0.17 ± 0.06 | 0.16 ± 0.06 | 0.18 ± 0.04 | 0.598 |
| NRBC (%) | 1.13 ± 1.95 | 1.38 ± 1.71 | 0.92 ± 1.46 | 1.25 ± 1.17 | 1.50 ± 1.61 | 0.93 ± 0.61 | 0.747 |
| NRBC (#) | 0.22 ± 0.68 | 0.14 ± 0.21 | 0.15 ± 0.25 | 0.10 ± 0.10 | 0.24 ± 0.55 | 0.27 ± 0.35 | 0.695 |

WBC- White Cell Count, RBC- Red Blood Count, MCV-Mean Cell Volume, MCH- Mean Cell Haemoglobin, MCHC- Mean Cell Haemoglobin Concentration, PLT- Platelet Count, PDW- Platelet Distribution Width, MPV-Mean Platelet Volume. One-way ANOVA p-values were presented. p<0.05 was considered statistically significant. Bolded p-values were statistically significant.

**S4: Comparison of Pre- and Post-Menstrual Haematological Parameters among Study Participants**

|  | **Normal (n = 71)** | |  | **Dysmenorrhea (n = 165)** | |  | **Oligomenorrhea (n = 29)** | |  |
| --- | --- | --- | --- | --- | --- | --- | --- | --- | --- |
| **Parameter** | **Pre** | **Post** | **p-value** | **Pre** | **Post** | **p-value** | **Pre** | **Post** | **p-value** |
| WBC (10⁹/L) | 7.21 ± 2.63 | 7.60 ± 2.86 | 0.327 | 7.26 ± 2.65 | 7.45 ± 2.70 | 0.605 | 6.69 ± 2.03 | 7.02 ± 2.48 | 0.797 |
| Lymphocytes (%) | 47.99 ± 19.72 | 49.25 ± 21.98 | 0.867 | 47.12 ± 18.48 | 49.20 ± 19.29 | 0.459 | 46.87 ± 13.19 | 46.48 ± 15.68 | 0.796 |
| Monocytes (%) | 6.80 ± 3.10 | 5.80 ± 2.94 | 0.050 | 7.21 ± 5.35 | 6.36 ± 4.47 | 0.109 | 9.35 ± 9.10 | 6.15 ± 3.81 | 0.234 |
| Neutrophils (%) | 43.27 ± 18.18 | 42.66 ± 20.32 | 0.979 | 43.36 ± 17.17 | 40.79 ± 17.42 | 0.241 | 43.12 ± 13.54 | 41.21 ± 15.36 | 0.761 |
| Eosinophils (%) | 1.45 ± 2.07 | 1.75 ± 4.02 | 0.684 | 1.59 ± 2.58 | 1.26 ± 1.68 | 0.134 | 1.70 ± 1.59 | 1.74 ± 1.46 | 0.852 |
| Basophils (%) | 0.12 ± 0.09 | 0.18 ± 0.38 | 0.282 | 0.14 ± 0.15 | 0.14 ± 0.15 | 0.974 | 0.11 ± 0.08 | 0.09 ± 0.04 | 0.815 |
| Lymphocytes (#) | 3.32 ± 1.56 | 3.37 ± 1.47 | 0.834 | 3.25 ± 1.40 | 3.48 ± 1.60 | 0.211 | 3.08 ± 1.40 | 3.30 ± 1.26 | 0.963 |
| Monocytes (#) | 0.47 ± 0.25 | 0.56 ± 1.05 | 0.442 | 5.04 ± 58.12 | 0.59 ± 0.59 | 0.326 | 0.53 ± 0.37 | 0.51 ± 0.42 | 0.982 |
| Neutrophils (#) | 3.29 ± 2.39 | 3.39 ± 2.81 | 0.728 | 3.34 ± 2.76 | 3.18 ± 2.14 | 0.661 | 2.93 ± 1.27 | 3.14 ± 1.97 | 0.699 |
| Eosinophils (#) | 0.09 ± 0.12 | 0.12 ± 0.26 | 0.441 | 0.11 ± 0.19 | 0.10 ± 0.13 | 0.364 | 0.11 ± 0.11 | 0.10 ± 0.07 | 0.236 |
| Basophils (#) | 0.01 ± 0.01 | 0.09 ± 0.63 | 0.285 | 0.02 ± 0.05 | 0.01 ± 0.01 | 0.420 | 0.01 ± 0.01 | 0.01 ± 0.00 | 0.858 |
| RBC (10¹²/L) | 4.55 ± 0.74 | 4.42 ± 0.64 | 0.204 | 4.79 ± 1.29 | 4.32 ± 0.52 | **<0.001** | 4.47 ± 0.79 | 4.18 ± 0.62 | **0.035** |
| Haemoglobin (g/dL) | 12.61 ± 1.27 | 11.64 ± 1.37 | **<0.001** | 12.86 ± 1.69 | 11.93 ± 1.30 | **<0.001** | 13.13 ± 1.61 | 11.42 ± 2.20 | **<0.001** |
| Haematocrit (%) | 39.48 ± 6.23 | 35.57 ± 4.04 | **<0.001** | 38.28 ± 6.94 | 35.29 ± 4.22 | **<0.001** | 37.76 ± 8.84 | 29.89 ± 8.60 | 0.333 |
| MCV (fL) | 87.95 ± 11.51 | 80.79 ± 11.84 | **<0.001** | 83.01 ± 14.72 | 81.82 ± 9.71 | 0.220 | 87.58 ± 13.31 | 83.63 ± 8.30 | 0.096 |
| MCH (pg) | 32.12 ± 32.25 | 26.74 ± 2.80 | 0.180 | 29.37 ± 15.86 | 28.30 ± 5.37 | 0.422 | 29.82 ± 3.32 | 27.60 ± 3.25 | **0.023** |
| MCHC (g/dL) | 32.48 ± 3.13 | 32.97 ± 2.71 | 0.233 | 34.25 ± 4.87 | 33.60 ± 2.02 | 0.115 | 34.41 ± 4.32 | 32.05 ± 2.46 | **0.024** |
| RDW-SD (fL) | 70.97 ± 30.09 | 75.05 ± 27.66 | 0.221 | 82.12 ± 15.47 | 137.19 ± 660.35 | 0.328 | 78.04 ± 23.53 | 65.92 ± 26.99 | 0.254 |
| RDW-CV (%) | 14.29 ± 15.60 | 14.47 ± 14.02 | 0.996 | 12.45 ± 8.16 | 11.60 ± 1.75 | 0.274 | 11.19 ± 1.22 | 15.04 ± 16.18 | 0.300 |
| Platelets (10⁹/L) | 236.99 ± 130.37 | 210.83 ± 81.17 | 0.098 | 229.25 ± 79.07 | 252.14 ± 265.62 | 0.295 | 238.83 ± 112.10 | 201.79 ± 101.07 | 0.148 |
| MPV (fL) | 8.35 ± 0.76 | 8.04 ± 0.81 | **0.039** | 8.39 ± 5.07 | 8.02 ± 0.89 | 0.892 | 10.36 ± 12.67 | 8.01 ± 1.04 | 0.318 |
| PDW (fL) | 10.62 ± 1.24 | 10.53 ± 1.68 | 0.723 | 10.37 ± 1.69 | 10.44 ± 1.70 | 0.895 | 10.26 ± 1.44 | 10.14 ± 2.04 | 0.757 |
| PCT (%) | 0.33 ± 1.18 | 0.17 ± 0.07 | 0.264 | 0.18 ± 0.06 | 0.18 ± 0.08 | 0.624 | 0.19 ± 0.07 | 0.16 ± 0.08 | 0.252 |
| NRBC (%) | 1.13 ± 1.95 | 1.69 ± 2.49 | 0.053 | 1.38 ± 1.71 | 1.84 ± 2.18 | **0.036** | 0.92 ± 1.46 | 1.34 ± 3.19 | 0.555 |
| NRBC (#) | 0.22 ± 0.68 | 0.30 ± 0.73 | 0.138 | 0.14 ± 0.21 | 0.29 ± 0.66 | **0.016** | 0.15 ± 0.25 | 0.77 ± 3.04 | 0.365 |

WBC- White Cell Count, RBC- Red Blood Count, MCV-Mean Cell Volume, MCH- Mean Cell Haemoglobin, MCHC- Mean Cell Haemoglobin Concentration, PDW- Platelet Distribution Width, MPV-Mean Platelet Volume. Paired t test p-values were presented. p<0.05 was considered statistically significant. Bolded p-values were statistically significant.

**S5: Association between sociodemographic characteristics of adolescents and menstrual abnormality**

|  | **Menstrual Cycle** | |  |
| --- | --- | --- | --- |
| **Variable** | **Normal (n=96)** | **Abnormal (n=293)** | **p-value** |
| **Age group (years)** |  |  | 0.169 |
| ≤15 | 48 (50.0) | 123 (42.0) |  |
| 16 – 19 | 48 (50.0) | 170 (58.0) |  |
| **Educational status** |  |  | 0.462 |
| Primary | 5 (5.2) | 9 (3.1) |  |
| JHS | 20 (20.8) | 52 (17.7) |  |
| SHS | 71 (74.0) | 232 (79.2) |  |
| **School** |  |  | 0.562 |
| Notre Dame SHS | 71 (74.0) | 232 (79.2) |  |
| St Thomas R/C JHS | 8 (8.3) | 19 (6.5) |  |
| Methodist | 17 (17.7) | 42 (14.3) |  |
| **Takes food supplements** |  |  | 0.072 |
| No | 80 (83.3) | 264 (90.1) |  |
| Yes | 16 (16.7) | 29 (9.9) |  |
| **Takes blood tonic** |  |  | 0.428 |
| No | 91 (94.8) | 283 (96.6) |  |
| Yes | 5 (5.2) | 10 (3.4) |  |
| **On medication** |  |  | 0.546 |
| No | 87 (90.6) | 259 (88.4) |  |
| Yes | 9 (9.4) | 34 (11.6) |  |
| **Type of medication** |  |  | 0.122 |
| Anti-ulcer | 2 (22.2) | 14 (41.2) |  |
| Analgesics | 0 (0.0) | 8 (23.4) |  |
| Antibiotics | 2 (22.2) | 4 (11.8) |  |
| Folic acid | 2 (22.2) | 3 (8.8) |  |
| Oral contraceptives | 0 (0.0) | 3 (8.8) |  |
| Anti-asthmatics | 1 (11.1) | 1 (2.9) |  |
| Other | 2 (22.2) | 1 (2.9) |  |
| **Frequency meal taken per day** |  |  | 0.619 |
| Twice | 7 (7.3) | 24 (8.2) |  |
| Thrice | 73 (76.0) | 208 (71.0) |  |
| 4 or more | 16 (16.7) | 61 (20.8) |  |
| **Frequency of consuming iron-rich diets** |  |  | 0.833 |
| Very often | 11 (11.5) | 29 (9.9) |  |
| Often | 11 (11.5) | 39 (13.3) |  |
| Rarely | 74 (77.1) | 225 (76.8) |  |
| **Have a diet restriction** |  |  | 0.158 |
| No | 84 (87.5) | 238 (81.2) |  |
| Yes | 12 (12.5) | 55 (18.8) |  |

Data presented as frequency (%), Chi-square p-values are presented, p<0.05 was considered statistically significant. Bolded p-values were statistically significant.
