# Supplementary material for: Menstrual Abnormalities, Hematological Profiles, and Educational Impact Among Ghanaian Adolescents: A School-Based Study
Source: Research Square preprint supplement (doi:10.21203/rs.3.rs-6898897/v1), 2025-08-27
Supplement: Supplementary file 2 [file 34f407b92eaec8d4b71cb3f6.docx]

**CONSENT FORM**

**Title:** **Menstrual Abnormalities, Hematological Profiles, and Educational Impact Among Ghanaian Adolescents: A School-Based Study.**

**Statement of person obtaining informed consent:**

I have fully explained this research to ____________________________________ and have given sufficient information about the study, including that on procedures, risks and benefits, to enable the prospective participant make an informed decision to or not to participate.

DATE: _____________________ NAME: _________________________________

**Statement of person giving consent:**

I have read the information on this study/research or have had it translated into a language I understand. I have also talked it over with the interviewer to my satisfaction.

I understand that my participation is voluntary (not compulsory).

I know enough about the purpose, methods, risks and benefits of the research study to decide that I want to take part in it.

I understand that I may freely stop being part of this study at any time without having to explain myself.

I have received a copy of this information leaflet and consent form to keep for myself.

NAME: _________________________________________________________________

DATE: ____________ SIGNATURE/THUMB PRINT: ___________________

MOTHER’S SIGNATURE (maintain if participant is under 18 years): ________________

MOTHER’S NAME: ______________________________________________________

FATHER’S SIGNATURE (maintain if participant is under 18 years):

_________________

FATHER’S NAME: ______________________________________________________

Committee for Human Research and Ethics

School of Sciences,

University of Energy and Natural Resources Sunyani, Ghana.

Email: chre@uenr.edu.gh
