# Supplementary material for: Menstrual Abnormalities, Hematological Profiles, and Educational Impact Among Ghanaian Adolescents: A School-Based Study
Source: Research Square preprint supplement (doi:10.21203/rs.3.rs-6898897/v1), 2025-08-27
Supplement: Supplementary file 3 [file a7b11db40a5eb2271aef234e.docx]

**RESEARCH QUESTIONNAIRE**

**TOPIC: Menstrual Abnormalities, Hematological Profiles, and Educational Impact Among Ghanaian Adolescents: A School-Based Study**

Please answer the following questions as accurately and honestly as possible. Your responses will contribute to our research on the effects of abnormal menstrual periods on adolescent girls' health and education.

Your identity and response will be kept confidential.

**ID**

# Personal Information

1. Name: ……………………………………………………………
2. Age: ……………………
3. Class: ……………………….
4. School: ………………………………………..
5. Contact Information (Optional): ………………………………

# Diet and drugs

1. Do you take any food supplement(s)? Yes
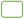
 No


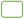


1. Are you taking blood tonic at the moment? Yes
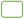
 No


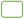


1. Are you on any medication(s)? Yes
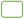
 No
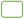

2. List of current medication(s) if any ..................................................
3. How many times do you eat a day? .................................................
4. How often do you consume iron-rich food such as red meat, green leafy vegetable, and legumes?

....................................................

1. Do you have any dietary restrictions that limit your intake of certain food? Yes
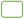
 No
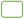


# Awareness of the Menstrual Cycle

1. Have heard of menstrual cycle?

Yes
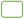
 No
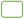


1. Causes of menstruation

Natural or physiological
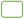
 Disease
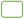
 Others
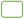


1. Where bleeding occur in menstruation

Bladder
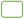
 Uterus
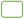
 Fallopian Tube
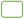
 Vagina
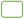


1. Menstruation in early adolescent is normal

Yes
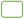
 No
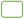


1. Source of knowledge about menstruation

Mother
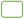
 Sister
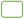
 Peers
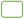
 School
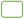


k. Are you aware that poor hygiene during menstruation can cause infections?

Yes
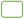
 No
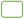


# Menstrual History

1. At what age did you start menstruating (having your first period)?

Before 10 years old
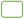


10-15 years old
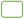


16 years or older
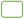


1. How did you feel at your first menstruation?

Normal
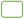
 Upset
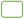
 Tensed
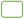


1. How long does your menstrual period usually last?

Less than 2 days
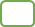


2-8 days
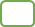


More than 8 days
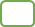


1. How often do you experience menstrual periods?

Less than 21 days
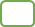


Regularly, every 21-35 days
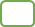


Irregularly, more than 35 days apart
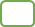


Other (please specify):………………

1. Do you experience pain during your menstrual period? Yes
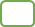
 No
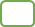


If yes, rate the pain

Mild
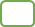
 Moderate
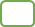
 Severe
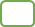


1. If there are any other symptoms, please state them

………………………………………………………………………………….

# Impact on Education

1. Does your menstrual period affect your ability to concentrate in class?

Yes
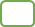
 No
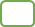


1. Does your menstrual period affect your participation in extracurricular activities?

Yes
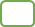
 No
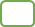


1. Have you ever missed school or classes due to your menstrual period?

Yes
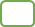
 No
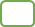


1. If yes, how frequently do you miss school or classes due to your menstrual period?

1 day
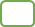


| 2 to 3 days  4 to 5 days  6 days or more | 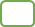  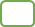  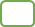 |
| --- | --- |

1. Have you ever discussed your menstrual problems with your teachers or school staff?

Yes
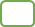
 No
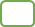


1. If yes, how supportive have your teachers or school staff been in addressing your menstrual problems?

Very supportive
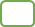


Somewhat supportive
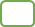


Not supportive
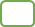


# Overall Well-Being

1. How would you rate your overall well-being during your menstrual period?

Very good
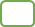


Good
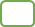


| Neutral  Bad  Very bad | 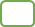  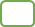  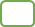 |
| --- | --- |

1. Do you take rest during your periods?

Yes
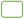
 No
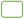


1. Do you feel that your menstrual period affects your social life or relationship with friends and family?

Yes
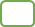
 No
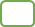


1. If yes, please describe how your menstrual periods affect your social life or relationships?

…………………………………………………………….

1. Do you feel comfortable discussing your menstrual health with your parents or guardians?

Yes
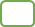
 No
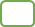


1. Have you ever felt ashamed about your menstrual period?

Yes
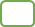
 No
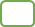


1. What do you use in washing your genital during menstruation?

| Ordinary water 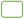 Feminine wash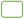   1. Absorbent used during menstruation   Sanitary pad 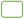 Tampons 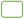  Cotton wool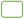 Multiple materials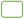   1. Are you able to afford sanitary pads/tampons? Yes 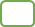 | I don’t wash/clean up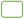  Pieces of cloth 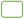  Others 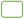  No 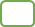 |
| --- | --- |

1. Do you change absorbents during school hours?

Yes
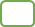
 No
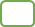


1. Does your school have adequate toilet facilities?

Yes
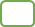
 No
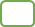


# Additional Comments

If you have any additional comments, experiences, or concerns related to abnormal menstrual periods and their impact on your health and education, please share them here.


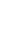

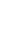

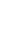

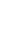

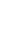


Thank you for your participation! Your responses are valuable to our research.

- **Twi terms**: "Dysmenorrhea" = *"Mbaa yadeɛ"* (validated by Twi linguist).
- **Iron-rich foods**: Local examples (e.g., "kontomire" for leafy greens).
